# Supplementary material for: Assessment of Potential Heavy Metal Contamination Hazards Based on GIS and Multivariate Analysis in Some Mediterranean Zones
Source: MDPI journal article supplement (doi:10.3390/agronomy12123220), 2022-12-19
Supplement: s1 [file s1]

Archive with 1 entries (1 files):
- agronomy-2117753-supplementary.pdf
