# Supplementary material for: Assessment of Potential Heavy Metal Contamination Hazards Based on GIS and Multivariate Analysis in Some Mediterranean Zones
Source: MDPI journal article supplement (doi:10.3390/agronomy12123220), 2022-12-19
Supplement: s1 [file s1 › agronomy-2117753-supplementary.pdf]

**Table S1.** Geoaccumulation index-based standard for contamination levels ( $I_{geo}$ ).

| $I_{geo}$ Class | $I_{geo}$ value   | Contamination level                       |
|-----------------|-------------------|-------------------------------------------|
| 0               | $I_{geo} \leq 0$  | Uncontaminated                            |
| 1               | $0 < I_{geo} < 1$ | Uncontaminated to moderately contaminated |
| 2               | $1 < I_{geo} < 2$ | Moderately contaminated                   |
| 3               | $1 < I_{geo} < 2$ | Moderately to strongly contaminated       |
| 4               | $2 < I_{geo} < 3$ | Strongly contaminated                     |
| 5               | $3 < I_{geo} < 4$ | Strongly to extremely contaminated        |
| 6               | $I_{geo} > 5$     | Extremely contaminated                    |

**Table S2** Pollution standards by contamination factor (CF).

|                                        |       |                            |
|----------------------------------------|-------|----------------------------|
| <b>Contamination Factor Index (CF)</b> | < 1   | Low contamination          |
|                                        | 1 – 3 | Moderate contamination     |
|                                        | 3 – 6 | Considerable contamination |
|                                        | > 6   | Very high contamination    |

**Table S3.** Nemerow Pollution Index' standard for pollution levels ( $I_n$ ).

| $P_n$ Class | $I_n$ value        | Pollution level                   |
|-------------|--------------------|-----------------------------------|
| 0           | $0 < I_n \leq 0.5$ | Unpolluted                        |
| 1           | $0.5 < I_n \leq 1$ | Unpolluted to moderately polluted |
| 2           | $1 < I_n \leq 2$   | Moderately polluted               |
| 3           | $2 < I_n \leq 3$   | Moderately to heavily polluted    |
| 4           | $3 < I_n \leq 4$   | Heavily polluted                  |
| 5           | $4 < I_n \leq 5$   | Heavily to extremely polluted     |
| 6           | $I_n > 5$          | Extremely polluted                |

**Table S4.** Sphericity test conducted by Bartlett and Kaiser-Meyer-Olkin (KMO)

| <b>Kaiser-Meyer-Olkin Measure of Sampling Adequacy</b> |                    |             |
|--------------------------------------------------------|--------------------|-------------|
| <b>Bartlett's Test of Sphericity</b>                   |                    | <b>0.59</b> |
|                                                        | Approx. Chi-Square | 66.31       |
|                                                        | df                 | 28          |
|                                                        | Sig.               | 0.00        |
